# Supplementary material for: miRNA-93 Inhibits GLUT4 and Is Overexpressed in Adipose Tissue of Polycystic Ovary Syndrome Patients and Women With Insulin Resistance
Source: PubMed Central journal article supplement — Diabetes. 2013 Jun 14;62(7):2278–86. doi: 10.2337/db12-0963 (PMC3712080; doi:10.2337/db12-0963), 2013-06-14

## SUPPLEMENTARY DATA

### ***Quantitative Real Time PCR (RT-qPCR)***

First strand cDNA was synthesized and RT-qPCR was performed using RT2 first strand kits (Cat#330401) and RT2 qPCR Master Mix (SABioscience, Frederick, MD). Experiments were performed on an Applied Biosystems 7300 Real-time PCR System, using SYBR Green as the detected fluorophore and ROX as the passive reference. For mRNA studies, ACTB was used as internal controls. Primers for mRNA were purchased from SABioscience, Frederick, MD. Primers for mature miRNAs were purchased from OriGene (Rockville, MD). miR-103 was used as an internal control as its expression levels are stable in adipocytes. Relative fold change of mRNA and miRNA expression of targeted genes and miRNA were calculated by using the  $\Delta\Delta C_t$  method.

### ***Differentiation of human preadipocytes to adipocytes***

To induced differentiation, preadipocytes were cultured to full confluence and then maintained in differentiation medium (Cat# DM-2, ZenBio Inc., Research Triangle Park, NC) for one week (day 7 of differentiation) before being cultured in adipocyte medium (Cat# AM-1, ZenBio Inc., Research Triangle Park, NC) for an additional week (day 14 of differentiation).

### ***Differentiation of mouse 3T3-L1 preadipocytes to adipocytes***

3T3-L1 preadipocytes (Cat# SP-L1-F) were purchased from Zenbio Company. Maintenance and differentiation of 3T3-L1 preadipocytes to adipocytes was followed the instructions in the 3T3-L1 Cell Care Manual. Briefly, 3T3-L1 preadipocytes were maintained in preadipocyte medium (Cat# PM-1-L1, ZenBio Inc., Research Triangle Park, NC) until 100% confluent in a humidified incubator, 37°C, with 5-10% CO<sub>2</sub>. Cells fed with PM-1-L1 every other day. Once the cells were confluent, incubate an additional 48 hours before initiating differentiation. Two days (day 0 of differentiation) after the cells have been confluent, removed the preadipocyte medium and replaced with an appropriate volume of 3T3-L1 differentiation medium (Cat# DM-2-L1, ZenBio Inc., Research Triangle Park, NC). After 3 days (day 3 of differentiation) cultured in differentiation medium, the differentiation medium was removed and replaced with 3T3-L1 adipocyte maintenance medium (Cat#AM-1-L1, ZenBio Inc., Research Triangle Park, NC). The cells were incubated for another 3 days in adipocyte maintenance medium. Cells were fed every 2-3 days using 3T3-L1 adipocyte maintenance medium until ready for assay. Assays were done on day 7-14 of differentiation.

### ***Transfection of vectors***

Six well plates of differentiated human (on day14) or 3T3-L1 (on day 7) adipocytes were used to do transfection by following instructions in the insert of transfection reagent. Briefly, for each well, 2  $\mu$ g of vectors were diluted in 100  $\mu$ l of Opti-MEM (Cat#51985, Life Technologies, Carlsbad, CA). Six  $\mu$ l of MegaTran 1.0 (Cat# TT200002, OriGene, Rockville, MD) was added to the diluted DNA and vortex the solution immediately for 10 seconds. The mixture was incubated for 10 minutes at room temperature. The mega Tran1.0/DNA mixture was added to well (already containing 900  $\mu$ l culture medium) gently. The plate was rocked to achieve even distribution of the complexes and incubated at 37 °C for 48 hours. The medium was replaced with fresh culture medium at 3 hours post-transfection. The assays were done at 48 hours post-transfection.

### ***Transfection of inhibitors***

Six well plates of differentiated human (on day14) or 3T3-L1 (on day 7) adipocytes were used to do transfection by following instructions in the insert of transfection reagent. Briefly, for each well, an appropriate amount of inhibitor (30 nM final concentration) was diluted in 250  $\mu$ l of Opti-MEM (Cat#51985, Life Technologies, Carlsbad, CA). Five  $\mu$ l of Lipofectamine®RNAiMAX reagent (Cat# 13778-100, Life Technologies, Carlsbad, CA) was diluted in another tube with 250  $\mu$ l of Opti-MEM. The diluted inhibitor and Lipofectamine®RNAiMAX reagent were combined, mixed and incubated for 15 minutes at room temperature. The mixture was added to well (already containing 2.5 ml culture medium) gently. The plate was rocked to achieve even distribution of the complexes and incubated at 37

## SUPPLEMENTARY DATA

°C for 48 hours. The medium was replaced with fresh culture medium at 4 hours post-transfection. The assays were done at 48 hours post-transfection.

SUPPLEMENTARY DATA

**Supplementary Table 1.** Differentially expressed microRNA from array of adipocytes derived from Lean PCOS patients vs. matched control women.

| Probeset ID            | Fold-Change<br>(PCOS vs.<br>Control) | p-value | Species |
|------------------------|--------------------------------------|---------|---------|
| hsa-miR-183-star_st    | -1.65                                | 0.005   | human   |
| hsa-miR-548a-3p_st     | 1.86                                 | 0.007   | human   |
| hsa-miR-574-5p_st      | -2.33                                | 0.007   | human   |
| hsa-miR-199a-3p_st     | -2.64                                | 0.012   | human   |
| hsa-miR-27a-star_st    | -1.58                                | 0.014   | human   |
| hsa-miR-1825_st        | -1.96                                | 0.017   | human   |
| hsa-miR-147_st         | 1.52                                 | 0.021   | human   |
| hsa-miR-548c-3p_st     | 1.73                                 | 0.023   | human   |
| hsa-miR-499-5p_st      | 2.11                                 | 0.026   | human   |
| hsa-miR-10a_st         | -1.84                                | 0.027   | human   |
| hsa-miR-150_st         | -2.71                                | 0.028   | human   |
| hsa-miR-1201_st        | 1.95                                 | 0.028   | human   |
| hsa-miR-30d_st         | 1.63                                 | 0.030   | human   |
| hsa-miR-34c-3p_st      | -1.55                                | 0.034   | human   |
| hsa-miR-768-3p_st      | -1.92                                | 0.035   | human   |
| hsa-miR-203_st         | -1.66                                | 0.036   | human   |
| hsa-miR-510_st         | -1.72                                | 0.041   | human   |
| hsa-miR-181c_st        | -2.46                                | 0.042   | human   |
| hsa-miR-154_st         | 3.62                                 | 0.042   | human   |
| hsa-miR-585_st         | 1.75                                 | 0.043   | human   |
| hsa-miR-93-star_st     | 2.10                                 | 0.046   | human   |
| hsa-miR-223_st         | 1.70                                 | 0.047   | human   |
| hsa-miR-422a_st        | -6.48                                | 0.048   | human   |
| hsa-miR-1270_st        | -1.57                                | 0.048   | human   |
| hsa-miR-498_st         | -1.58                                | 0.049   | human   |
| hsa-miR-125b-2-star_st | -2.55                                | 0.049   | human   |
| hsa-miR-195_st         | -2.71                                | 0.050   | human   |
| hsa-miR-23b_st         | -1.70                                | 0.050   | human   |
| mmu-miR-382-star_st    | 1.57                                 | 0.002   | mouse   |
| mmu-miR-433-star_st    | 1.59                                 | 0.003   | mouse   |
| mmu-miR-540-3p_st      | 1.54                                 | 0.006   | mouse   |
| mmu-miR-29b-star_st    | -1.68                                | 0.010   | mouse   |
| mmu-miR-379_st         | -3.19                                | 0.013   | mouse   |
| mmu-miR-139-5p_st      | -7.59                                | 0.013   | mouse   |
| mmu-miR-484_st         | 1.92                                 | 0.015   | mouse   |
| mmu-miR-702_st         | 1.61                                 | 0.019   | mouse   |
| mmu-miR-433_st         | 2.33                                 | 0.020   | mouse   |
| mmu-miR-199b-star_st   | -1.51                                | 0.022   | mouse   |
| mmu-miR-135a-star_st   | -1.72                                | 0.025   | mouse   |
| mmu-miR-615-3p_st      | -1.62                                | 0.026   | mouse   |
| mmu-miR-689_st         | -3.45                                | 0.031   | mouse   |
| mmu-miR-28-star_st     | 1.80                                 | 0.032   | mouse   |
| mmu-miR-505_st         | 1.52                                 | 0.032   | mouse   |
| mmu-miR-709_st         | -4.23                                | 0.036   | mouse   |
| mmu-miR-10b_st         | -1.98                                | 0.037   | mouse   |
| mmu-miR-30e_st         | 2.45                                 | 0.038   | mouse   |
| mmu-miR-10a_st         | -1.59                                | 0.038   | mouse   |
| mmu-miR-293_st         | 2.52                                 | 0.039   | mouse   |
| mmu-miR-467b_st        | 2.66                                 | 0.040   | mouse   |

SUPPLEMENTARY DATA

|                      |       |       |         |
|----------------------|-------|-------|---------|
| mmu-miR-330_st       | 1.78  | 0.043 | mouse   |
| mmu-miR-101a-star_st | 1.57  | 0.046 | mouse   |
| mmu-let-7e_st        | -2.32 | 0.046 | mouse   |
| mmu-miR-467e_st      | 1.82  | 0.049 | mouse   |
| mmu-miR-495_st       | 1.55  | 0.050 | mouse   |
| mml-miR-30a-5p_st    | 1.54  | 0.006 | primate |
| ppa-miR-29b_st       | 1.53  | 0.006 | primate |
| mml-miR-150_st       | -4.00 | 0.011 | primate |
| mml-miR-18b_st       | 1.82  | 0.013 | primate |
| ppa-miR-224_st       | -6.18 | 0.016 | primate |
| ppy-miR-198_st       | -2.46 | 0.017 | primate |
| ppa-miR-98_st        | -1.82 | 0.018 | primate |
| mml-miR-18_st        | 4.95  | 0.019 | primate |
| mml-miR-99a_st       | -1.59 | 0.022 | primate |
| mml-miR-219-5p_st    | -1.56 | 0.022 | primate |
| mml-miR-211_st       | 3.53  | 0.024 | primate |
| mml-miR-128a_st      | -1.97 | 0.024 | primate |
| ppy-miR-199a_st      | -2.77 | 0.025 | primate |
| ppy-miR-154_st       | 2.31  | 0.026 | primate |
| ptr-miR-23b_st       | -1.92 | 0.028 | primate |
| mml-miR-653_st       | 3.87  | 0.031 | primate |
| mml-miR-888_st       | 1.50  | 0.032 | primate |
| ppy-miR-135_st       | 1.61  | 0.032 | primate |
| mml-miR-553_st       | 2.09  | 0.032 | primate |
| ppa-miR-141_st       | 1.70  | 0.033 | primate |
| ppy-miR-23a_st       | -1.92 | 0.034 | primate |
| mml-miR-369-3p_st    | -1.85 | 0.034 | primate |
| mml-miR-133b_st      | 1.91  | 0.034 | primate |
| ptr-miR-105_st       | 1.60  | 0.037 | primate |
| mml-miR-886-5p_st    | 3.55  | 0.037 | primate |
| ppa-miR-134_st       | -3.02 | 0.039 | primate |
| ppa-miR-196_st       | -1.63 | 0.042 | primate |
| ppa-miR-195_st       | -2.45 | 0.043 | primate |
| mml-miR-20b_st       | 5.43  | 0.044 | primate |
| ppy-miR-23b_st       | -1.71 | 0.046 | primate |
| ptr-miR-194_st       | -2.35 | 0.047 | primate |
| mml-miR-505_st       | 1.52  | 0.048 | primate |
| mml-miR-455-5p_st    | 1.54  | 0.050 | primate |
| rno-miR-425_st       | 2.26  | 0.001 | rat     |
| rno-miR-30e_st       | 4.35  | 0.007 | rat     |
| rno-let-7i_st        | -1.57 | 0.020 | rat     |
| rno-miR-369-5p_st    | 2.68  | 0.022 | rat     |
| rno-miR-150_st       | -5.35 | 0.022 | rat     |
| rno-miR-379_st       | -2.51 | 0.034 | rat     |
| rno-miR-451_st       | 2.77  | 0.038 | rat     |
| rno-miR-195_st       | -2.48 | 0.042 | rat     |
| rno-miR-23b_st       | -1.91 | 0.042 | rat     |
| rno-miR-128_st       | -1.61 | 0.049 | rat     |

SUPPLEMENTARY DATA

**Supplementary Table 2.** Differentially expressed human miRNA in PCOS (2-fold change,  $p < 0.05$ ).

| <b>miRNA</b>           | <b>Fold change (PCOS vs. Controls)</b> | <b>p-value</b> |
|------------------------|----------------------------------------|----------------|
| hsa-miR-422a_st        | -6.48                                  | 0.048          |
| hsa-miR-150_st         | -2.71                                  | 0.028          |
| hsa-miR-195_st         | -2.71                                  | 0.050          |
| hsa-miR-199a-3p_st     | -2.64                                  | 0.012          |
| hsa-miR-125b-2-star_st | -2.55                                  | 0.049          |
| hsa-miR-181c_st        | -2.46                                  | 0.042          |
| hsa-miR-574-5p_st      | -2.33                                  | 0.007          |
| hsa-miR-93-star_st     | 2.10                                   | 0.046          |
| hsa-miR-499-5p_st      | 2.11                                   | 0.026          |
| hsa-miR-154_st         | 3.62                                   | 0.042          |

SUPPLEMENTARY DATA

**Supplementary Table 3.** Differentially Expressed miRNA in PCOS adipose tissue.

| <b>miRNA</b> | <b>Fold-Change<br/>(PCOS vs. Control)</b> | <b>p-value</b> | <b>miRNA<br/>confirmed</b> |
|--------------|-------------------------------------------|----------------|----------------------------|
| miR-93       | +2                                        | 0.04           | Yes                        |
| miR-30d      | +1.6                                      | 0.02           | Trend                      |
| miR-574-5p   | -2.3                                      | 0.007          | Yes                        |
| miR-223      | 2                                         | 0.003          | Yes                        |
| miR-21       | -2.8                                      | 0.03           | Yes                        |
| miR-133a     | +2                                        | 0.03           | Yes                        |
| miR-133b     | +2                                        | 0.02           | Yes                        |

SUPPLEMENTARY DATA

**Supplementary Table 4.** Shared Predicted Gene Targets of miR-93 (miRanda, TargetScan, and PicTar)

|          |          |          |         |         |                |         |
|----------|----------|----------|---------|---------|----------------|---------|
| ACSL4    | CAMTA1   | EPHA4    | KPNA3   | PKD2    | SEMA4B         | TSG101  |
| ADAM9    | CD69     | EPHA5    | LACE1   | PLS1    | SERP1          | TSHZ3   |
| ANKRD13C | CDC37L1  | EPHA7    | LAPT4A  | PPP2R2A | SLC17A7        | TXNIP   |
| ANUBL1   | CDCA7    | F3       | LHX6    | PPP3R1  | SLC2A4 (GLUT4) | USP3    |
| ARHGAP1  | CENPO    | FAM13C   | LHX8    | PPP6C   | SLC40A1        | USP32   |
| ARHGAP12 | CEP97    | FAT2     | LIMA1   | PRR15   | SMAD7          | USP6    |
| ARHGEF10 | CHD9     | FBXL5    | LMO3    | PRR16   | SMOC1          | WDR37   |
| ARHGEF3  | CLIP4    | FBXW11   | MAP3K5  | PRRG1   | SMOC2          | ZBTB4   |
| ARID4B   | CMPK1    | FEM1C    | MAP7    | PTPN4   | SNX16          | ZBTB7A  |
| ATAD2    | CNOT7    | FJX1     | MAPRE1  | RAB5B   | SOX4           | ZBTB9   |
| ATG16L1  | CRIM1    | FNDC3A   | MASTL   | RAP2C   | SSX2IP         | ZFPM2   |
| ATL3     | CRY2     | FOXJ2    | MCL1    | RAPGEF4 | STC1           | ZFYVE9  |
| BAHD1    | DDX5     | FRMD6    | MED12L  | RASD1   | STK38          | ZNF148  |
| BAMBI    | DERL2    | GNB5     | MINK1   | RASL11B | TCTEX1D1       | ZNF236  |
| BCL11B   | DNAJB9   | HAS2     | MKRN1   | RBL1    | TET1           | ZNF362  |
| BICD2    | DPYSL2   | HBP1     | MLL4    | RBL2    | TGOLN2         | ZNF512B |
| BNIP2    | DRD1     | HIF1A    | MORF4L1 | REEP3   | TNFRSF21       | ZNFX1   |
| BTBD10   | DUSP2    | HN1      | MYCN    | RGL1    | TNKS1BP1       |         |
| BTG3     | DYNC1LI2 | HPS5     | NAGK    | RGMA    | TNKS2          |         |
| C11orf30 | E2F1     | KAT2B    | NCOA3   | RHOC    | TNRC6A         |         |
| C11orf82 | EGLN3    | KCNJ10   | NR4A3   | RNF128  | TOPORS         |         |
| C15orf17 | EGR2     | KIAA0922 | NUP35   | RRAGD   | TRIM3          |         |
| C1orf63  | EIF5A2   | KIF23    | PCDHA1  | RSBN1   | TRIM36         |         |
| C5orf41  | ELK3     | KLHL20   | PEX5L   | SAR1B   | TRIP10         |         |

SUPPLEMENTARY DATA

**Supplementary Figure 1.** Transfection efficiency of human and 3T3-L1 differentiated adipocytes. Human and 3T3-L1 adipocytes were cultured in four chambers slide. After transfection, GFP positive cells were counted under microscope in three chambers of slide. Human differentiated adipocytes (A: DAPI, B: GFP, C: Merge). 3T3-L1 adipocytes. (D: DAPI, E: GFP, F: Merge).

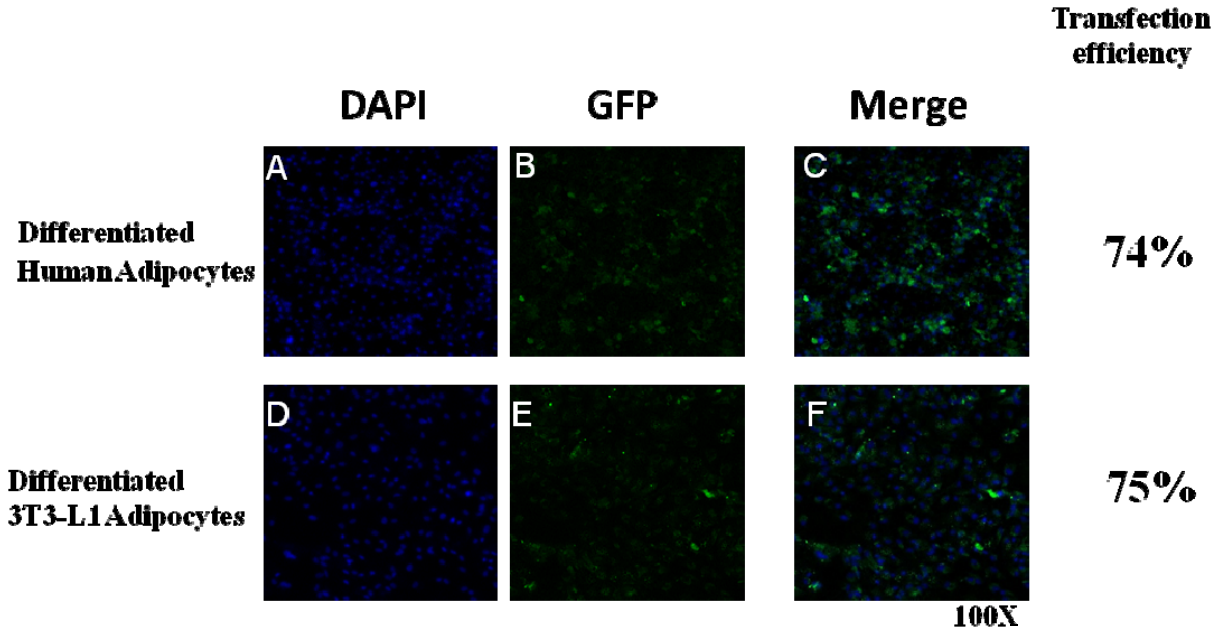



SUPPLEMENTARY DATA

**Supplementary Figure 2.** Simplified scheme of IRS-1/PI3K/AKT pathway and insulin binding to its receptor, with protein expression of various insulin signaling targets. 10 control (BMI range: 21.3-47.1, average: 26.7) and 13 PCOS (BMI range: 23.1-40.4, average: 30.69) were analyzed by western blotting. Isolated adipocytes were treated with 100 nM human insulin for 10 minutes. (A) Insulin binding is expressed as percentage of insulin binding inhibition. (B-O) Graphs indicate quantification of western blots. Total, basal and insulin-stimulated phosphorylated proteins of selected components are represented by bars (medium  $\pm$  SE): IR (blue), IRS-1 (green), PI3K (red), AKT (violet), GSK3 $\alpha/\beta$  (orange).

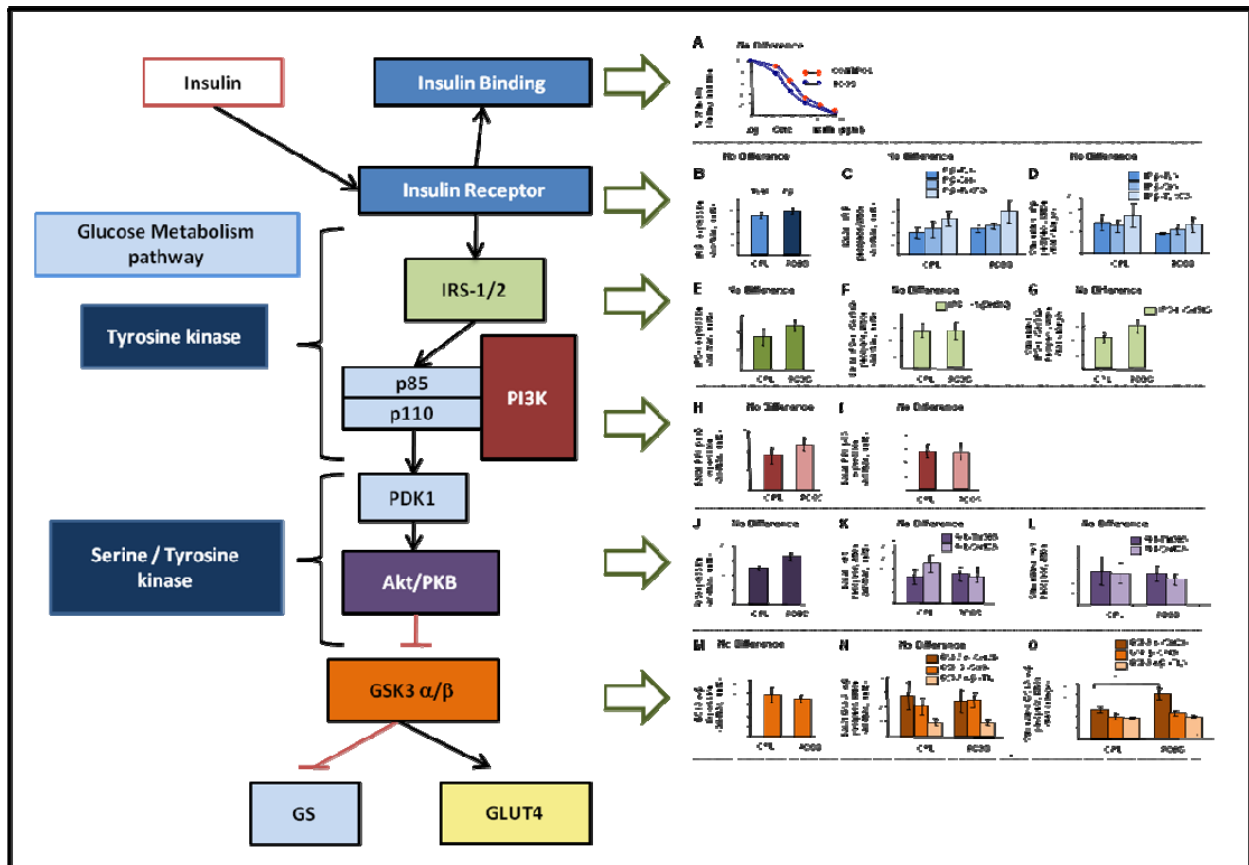



SUPPLEMENTARY DATA

**Supplementary Figure 4.** Confirmation of differentially expressed miRNA. Independent samples were used to confirm differential expression of miRNA in adipose from non-obese women with PCOS. (A) RT-PCR confirmed miR-93 to be significantly overexpressed ( $p < 0.01$ ) in PCOS ( $n=8$ ) vs. control ( $n=7$ ). (B) In the same samples, RT-PCR confirmed miR-574 to be significantly under expressed ( $p < 0.05$ ) in PCOS vs. controls.

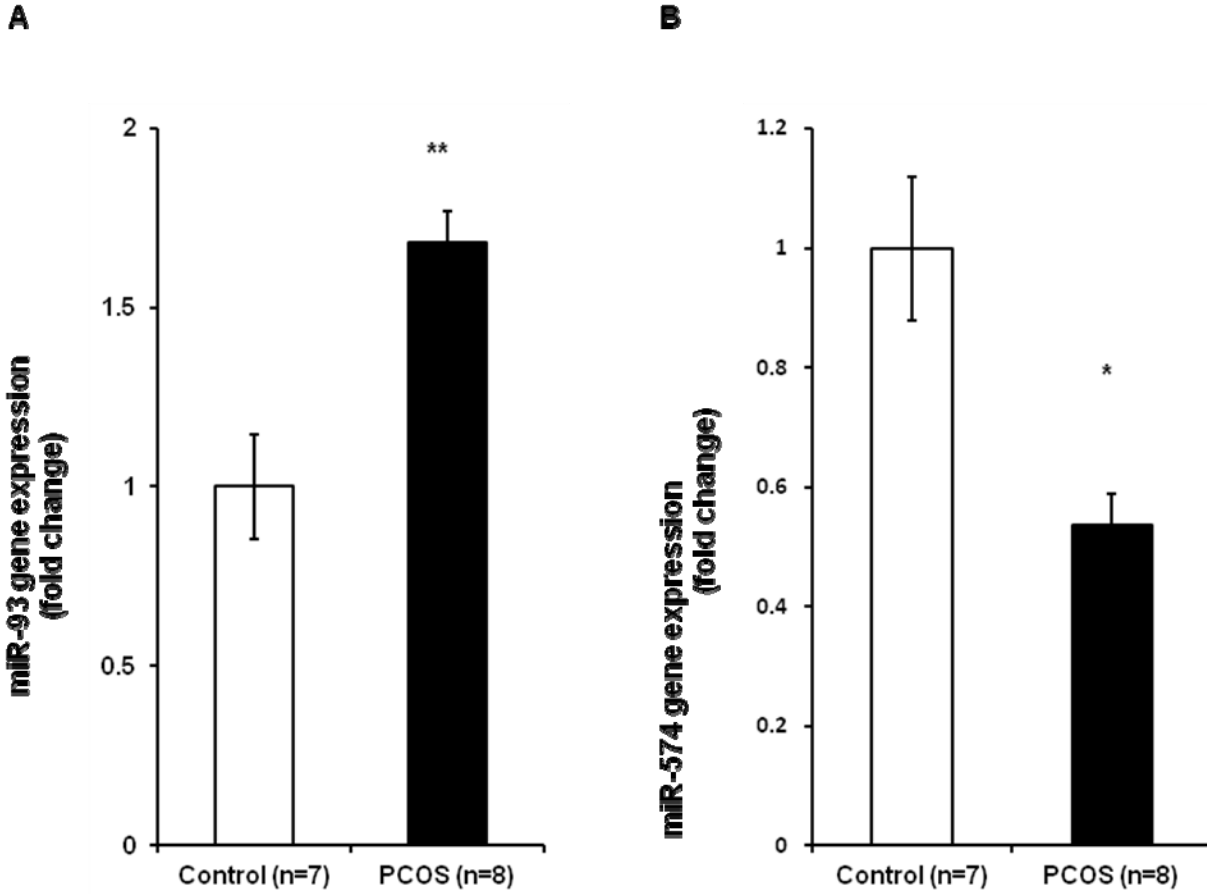

SUPPLEMENTARY DATA

**Supplementary Figure 5.** miR-133 and miR-223 genes expression in human adipose tissues. CRL: control, CRL/IR: control with insulin resistance, PCOS/IR: PCOS with insulin resistance. \*,  $p < 0.05$ ; \*\*,  $p < 0.01$  vs CRL, CRL/IR or PCOS.

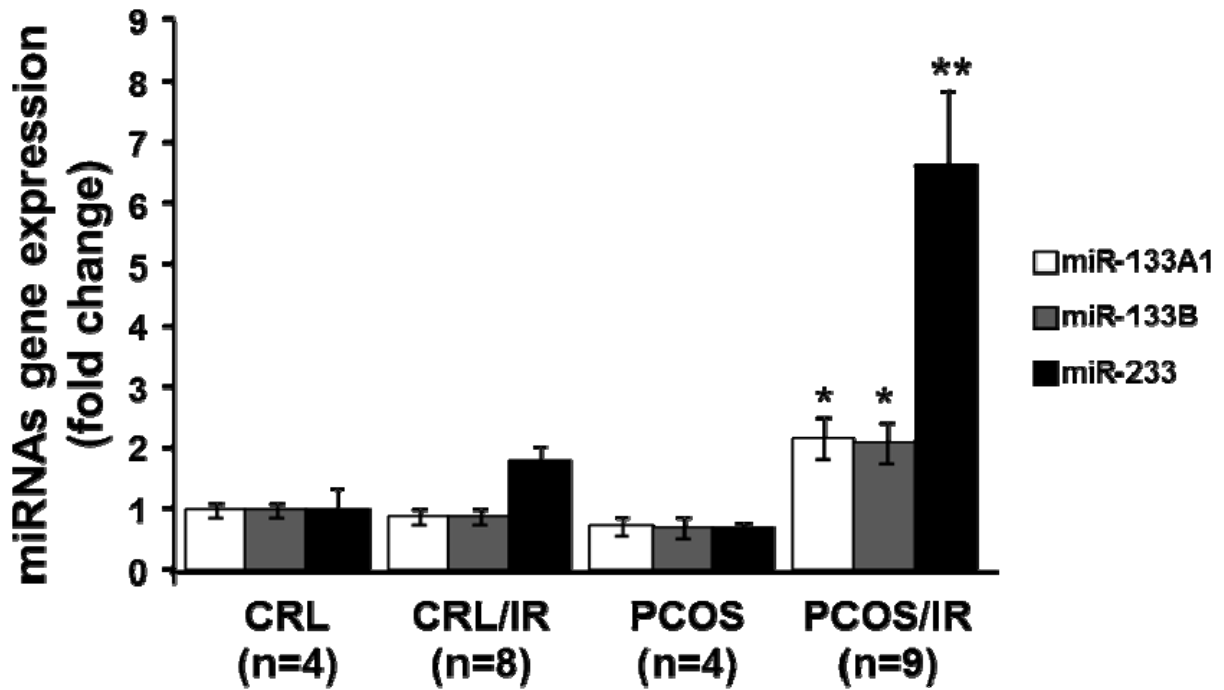

SUPPLEMENTARY DATA

**Supplementary Figure 6.** Transfection of miR-93 overexpression vector. (A) Differentiated human adipocytes in light phase contrast, x200. (B) GFP plasmid vector. (C) Merge of light and GFP. (D) Transfection controls.

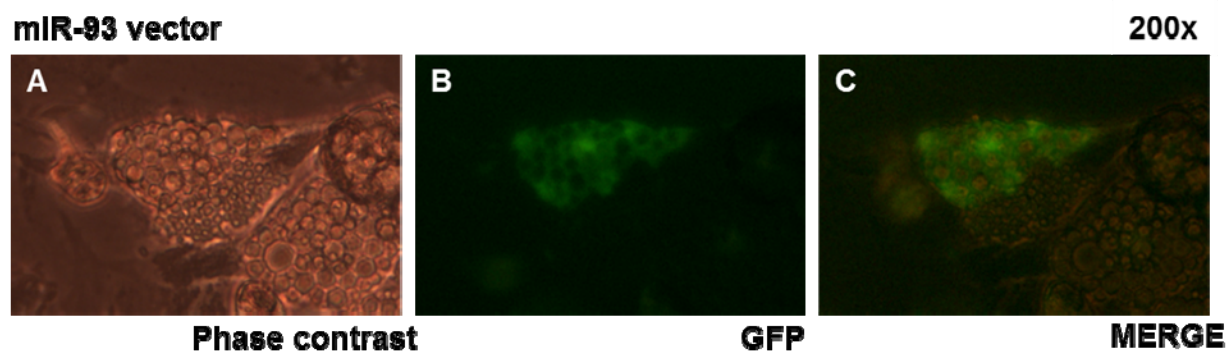

**D**

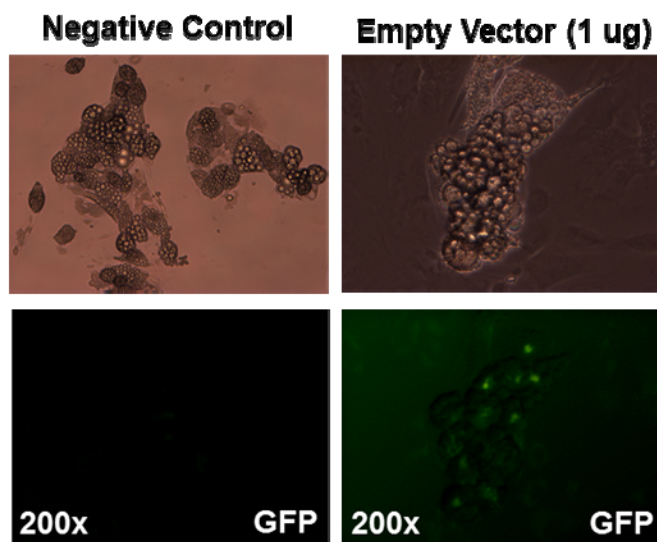

SUPPLEMENTARY DATA

**Supplementary Figure 7.** GLUT4 expression in miR-155 overexpressed human cultured differentiated adipocytes (n=3). (A) protein; (B) gene expression.

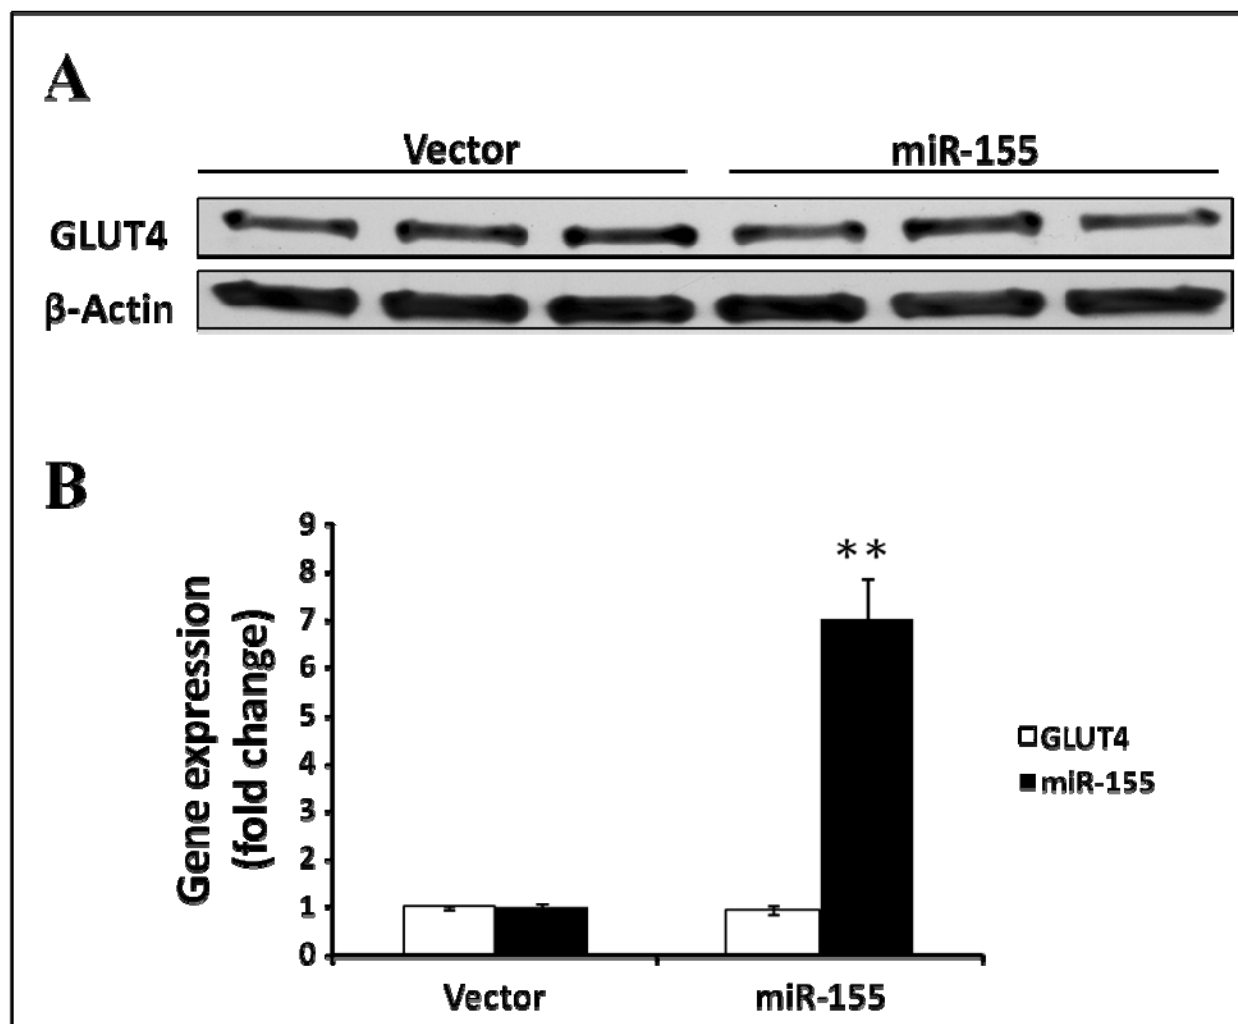

**Supplementary Figure 8.** miR-133 and 223 genes expression in miR-93 overexpressed human cultured differentiated adipocytes (n=3).

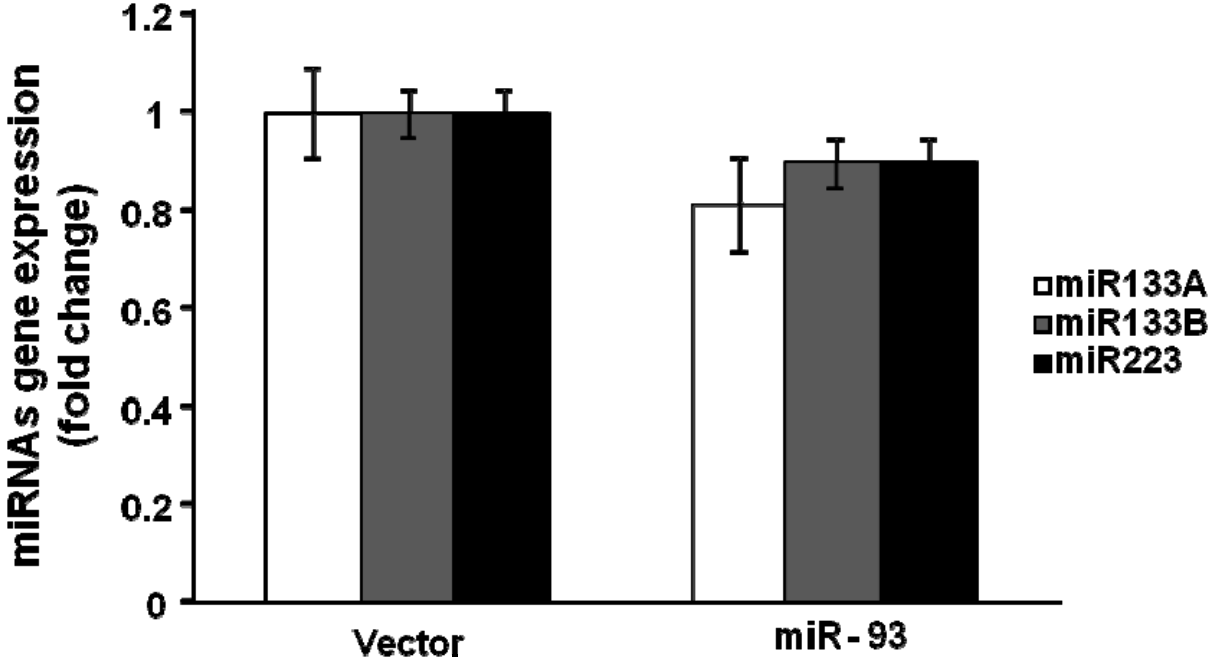

SUPPLEMENTARY DATA

**Supplementary Figure 9.** Protein expression of GLUT4 and PTEN in human cultured differentiated adipocytes (n=3). (A) Western blot. (B) Western blot band density assay.

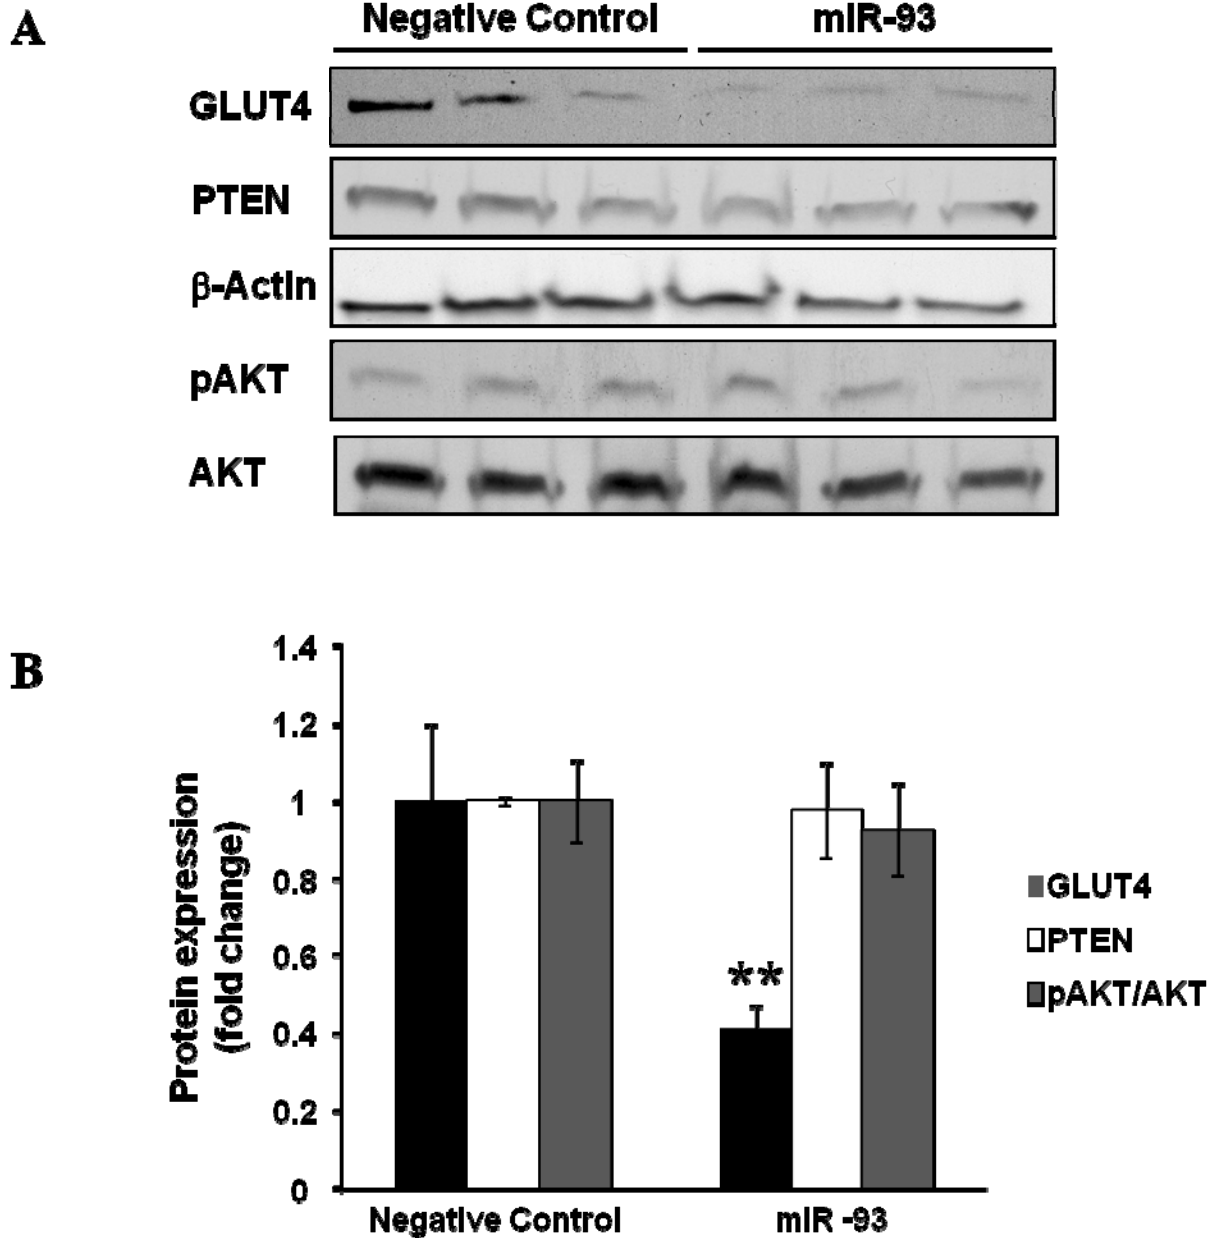



SUPPLEMENTARY DATA

**Supplementary Figure 10.** Transfection of miR-93 overexpression vector in mouse 3T3-L1 adipocytes. (A) Differentiated 3T3-L1 adipocytes in light phase contrast, x200. (B) GFP plasmid vector. (C) Merge of light and GFP.

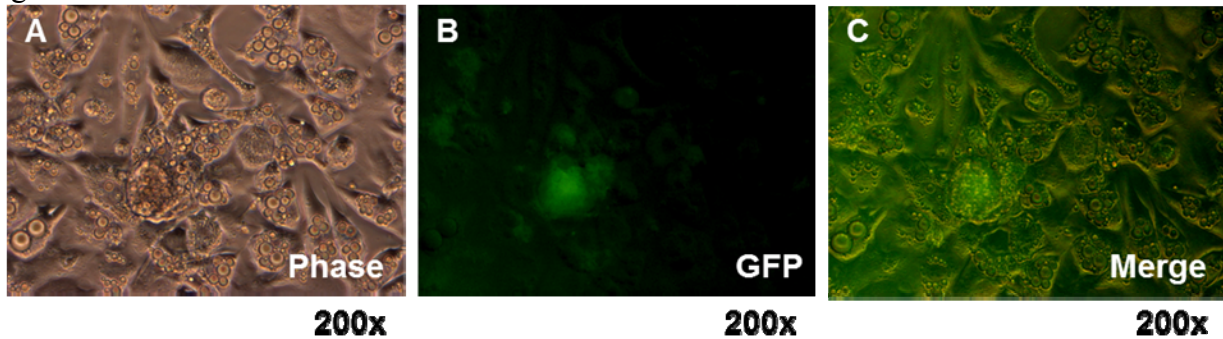

**Supplementary Figure 11.** Expression vector and immunofluorescence negative controls. Imaging of GLUT4 controls demonstrate (A) cell morphology by light phase contrast; (B) GFP signal in the absence of a vector with GFP-reporter; (C) minimal background with an exposure time of 485 msec; and (D) low non-specific binding by secondary Ab.

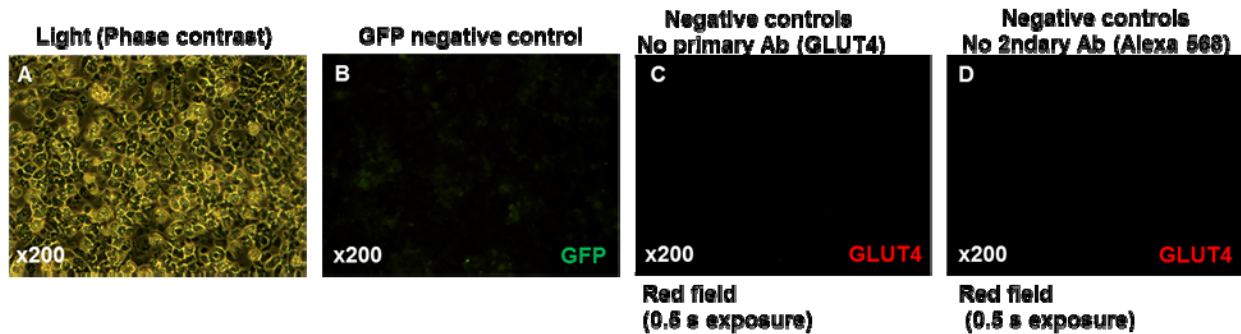

Supplement: supp_db12-0963_DB120963SupplementaryData.pdf [file supp_db12-0963_DB120963SupplementaryData.pdf]
